# Supplementary material
Source: PubMed Central journal article supplement (PMC4662594)
Supplement: NIHMS671677-supplement-Supplemental.pdf [file NIHMS671677-supplement-Supplemental.pdf]

## Supplementary Materials for “IsoDOT Detects Differential RNA-isoform Usage with respect to a Categorical or Continuous Covariate with High Sensitivity and Specificity”

### A Calculation of effective length

An RNA-seq fragment is a segment of RNA to be sequenced. Usually only part of an RNA-seq fragment is sequenced: one end or both ends, hence single-end sequencing or paired-end sequencing. All the discussions in this section are for paired-end reads, though the extension to single-end reads is straightforward. The minimum fragment size is the read length, denoted by  $d$ . This happens when the two reads of a fragment completely overlap. We impose an upper bound for the fragment length based on prior knowledge of the experimental procedure and denote the upper bound by  $l_M$ . Then the fragment length  $l$  satisfies  $d \leq l \leq l_M$ . We denote the distribution of the fragment length for sample  $i$  by  $\varphi_i(l)$ , which can be calculated using observed read alignment information.

For the  $i$ -th sample, the effective length of exon  $j$  of  $r_j$  base pairs (bps) is

$$\eta_{i,\{j\}} = f(r_j, d, l_M, \varphi_i) = \begin{cases} 0 & \text{if } r_j < d \\ \sum_{l=d}^{\min(r_j, l_M)} \varphi_i(l)(r_j + 1 - l) & \text{if } r_j \geq d \end{cases}.$$

If  $r_j < d$ , the exon is shorter than the shortest fragment length, and thus the effective length of this exon is 0. In other words, no RNA-seq fragment is expected to overlap and only overlap with this exon. If  $r_j \geq d$ , the effective length is  $r_j + 1 - l$ , i.e., there are  $r_j + 1 - l$  distinct RNA-seq fragments that can be sequenced from this exon (Figure 1). Then  $\sum_{l=d}^{\min(r_j, l_M)} \varphi_i(l)(r_j + 1 - l)$  is summation across all likely fragment lengths, weighted by the probability of having fragment length  $l$ .

In the following discussions, to simplify the notation, we skip the subscript of  $i$ . For two exons  $j$  and  $k$  ( $j < k$ ) of lengths  $r_j$  and  $r_k$ , which are adjacent in the transcript, the effective length for the fragments that cover both exons is

$$\eta_{\{j,k\}} = f(r_j + r_k, d, l_M, \varphi) - \eta_{\{j\}} - \eta_{\{k\}}. \quad (1)$$

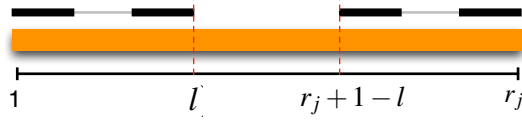

Figure 1: An illustration of effective length calculation for an exon of  $r_j$  bps and RNA-seq fragment of  $l$  bps. The orange box indicates the exon, and the black lines above the orange box indicate two RNA-seq fragments, while each RNA-seq fragment is sequenced by a paired-end read. There are  $r_j + 1 - l$  distinct choices to select an RNA-seq fragment of  $l$  bps from this exon, and thus the effective length is  $r_j + 1 - l$ .

For three exons  $j$ ,  $h$ , and  $k$  ( $j < h < k$ ) of lengths  $r_j$ ,  $r_h$  and  $r_k$ , which are adjacent in the transcript, the effective length for the fragments that cover all three exons is

$$\eta_{\{j,h,k\}} = f(r_j + r_h + r_k, d, l_M) - \eta_{\{j,h\}} - \eta_{\{h,k\}} - \eta_{\{j,(h),k\}} - \eta_{\{j\}} - \eta_{\{h\}} - \eta_{\{k\}},$$

where  $\eta_{\{j,(h),k\}}$  is the effective length in the scenario that the transcript covers consecutive exons  $j$ ,  $h$ , and  $k$ , whereas the observed paired-end read only covers exons  $j$  and  $k$ .

$$\eta_{\{j,(h),k\}} = \begin{cases} 0 & \text{if } (r_j, r_h, r_k) \in R_1 \\ \sum_{l=2d+r_h}^{\min(r_j+r_h+r_k, l_M)} \varphi(l) \delta_l & \text{otherwise} \end{cases}$$

where  $R_1 = \{(r_j, r_h, r_k) : r_j < d \text{ or } r_k < d \text{ or } r_h + 2d > l_M\}$ , and  $\delta_l = \min(r_j, l - r_h - d) - \max(d, l - r_h - r_k) + 1$ . The above formula is derived by the following arguments. Let  $l_j$  and  $l_k$  be the lengths of the parts of the fragment that overlaps with exon  $j$  and  $k$ , respectively. Given  $l$ , the restriction of  $l_j$  and  $l_k$  are  $l = l_j + l_k + r_h$ ,  $d \leq l_j \leq r_j$ , and  $d \leq l_k \leq r_k$ , and thus the range of  $l_j$  is  $\max(d, l - r_h - r_k) \leq l_j \leq \min(r_j, l - r_h - d)$ . For more than 3 consecutive exons, the effective lengths can be calculated using recursive calls to the above equations.

In practice, a few sequence fragments may be observed even when the effective length is zero, which may be due to sequencing errors. To improve the robustness of our method, we modify the design matrix  $\mathbf{X}$  by adding a pre-determined constant **eLenMin** to each element of  $\mathbf{X}$ .

## B Selection of candidate isoforms

For each gene, we select a set of candidate isoforms given the fragment counts at each exon set. We define a start exon as an exon that is only connected to downstream exons and an end exon as an exon that is only connected to upstream exons. An initial set of start and end exons can be identified simply by examining the observed exon sets.

Next, we seek to find more start and end exons by identifying break points where the read-depth of two adjacent exons are different. Specifically, suppose the gene of interest has  $h$  exons. Let  $y_{\{k\}}$  be the number of fragments overlapping the  $k$ th exon of this gene. We apply a Pearson chi-squared test to assess whether the frequency distribution of  $y_{\{k-1\}}$  and  $y_{\{k\}}$  is significantly different from theoretical expectation based on their effective lengths. For  $k = 2, \dots, h$ , there are  $h - 1$  possible break points, which correspond to  $h - 1$  p-values:  $\text{pB}_1, \dots, \text{pB}_h$ . We order those possible break points by the corresponding p-values in ascending order and select the top

$$\min \left( \text{maxBreaks}, \sum_{k=2}^h I(\text{pB}_k < \text{pvalBreaks}) \right)$$

break points, where  $I(\cdot)$  is an indicator function, **maxBreaks** and **pvalBreaks** are two pre-set parameters. **maxBreaks** is the maximum number of break points, with default value 5, and **pvalBreaks** is a p-value cutoff, with default value 0.05. If the  $k$ -th break points is selected, the  $(k - 1)$ th exon is added to the set of start exons and the  $k$ th exon is added to the set of end exons. After identifying all possible start and end exons, we can construct all isoforms that have consecutive exons.

For each exon set, we assign a p-value to quantify whether it is expressed. Suppose there are  $n_T$  fragments for the gene of interest and among them  $n_j$  fragments are from the  $j$ th exon set. Then the expression p-value is  $\text{pE}_j = \text{pbinom}(n_j, n_T, l_j/l_T)$ , where  $\text{pbinom}(\cdot, n, \pi)$  is cumulative binomial distribution function with  $n$  trials and probability of success  $\pi$ ,  $l_j$  is the effective length of the  $j$ th exon set, and  $l_T$  is the total effective length of this gene. We claim the  $j$ th exon set is expressed if

$$\text{pE}_j \geq \text{pvalExpress} \text{ and } \frac{n_j/l_j}{n_T/l_T} > \text{foldExpress},$$

where **pvalExpress** and **foldExpress** are two pre-set parameters, with default values 0.01 and 1/5, respectively.

Finally, we select all the expressed exon sets that harbor at least on exon-skipping event, and order them by the  $pE_j$  in a descending order. Then for each of these ordered exon sets, we construct new RNA-isoforms by inserting this exon set into each existing isoform if this exon set is compatible with the isoform. We stop adding more isoforms if either

$$q/m > \text{pMaxRel} \text{ or } q > \text{pMaxAbs}$$

where  $q$  is the number of isoforms,  $\text{pMaxRel}$  and  $\text{pMaxAbs}$  are pre-set parameters with default values 10 and 2000, respectively. In other words, we allow the number of isoforms to be at most 10 times the number of exon sets and the total number of isoforms to be at most 2000. Users can change these default values. Our penalized regression can handle the situation  $\text{pMaxRel}=100$  and  $\text{pMaxAbs}=100,000$ ; however it may significantly reduce the computational efficiency.

### C Model fitting of the penalized negative binomial regression

Let  $f(y_i; \mu_i, \phi)$  be the density function for a negative binomial distribution with mean  $\mu_i$  and dispersion parameter  $\phi$  (hence variance  $\mu_i + \phi\mu_i^2$ ):

$$f(y_i; \mu_i, \phi) = \frac{\Gamma(y_i + 1/\phi)}{y_i! \Gamma(1/\phi)} \left( \frac{1}{1 + \phi\mu_i} \right)^{1/\phi} \left( \frac{\phi\mu_i}{1 + \phi\mu_i} \right)^{y_i}. \quad (2)$$

As  $\phi \rightarrow 0$ ,  $f(y_i; \mu_i, \phi)$  converges to Poisson distribution with mean  $\mu_i$ . While all the following discussions focus on negative binomial distribution, they can be easily extended to Poisson situation and we omit the details here. Using negative binomial distribution, the log likelihood is

$$l(\mathbf{y}, \boldsymbol{\mu}, \phi) = \sum_{i=1}^n \left[ \log \left( \frac{\Gamma(y_i + 1/\phi)}{y_i! \Gamma(1/\phi)} \right) + y_i \log \left( \frac{\phi\mu_i}{1 + \phi\mu_i} \right) - \frac{1}{\phi} \log(1 + \phi\mu_i) \right], \quad (3)$$

where  $\mathbf{y} = (x_1, \dots, x_n)^\top$ ,  $\boldsymbol{\mu} = (\mu_1, \dots, \mu_n)^\top$ , and  $n$  indicates sample size. We further assume  $\mu_i = \sum_{j=1}^J x_{ij} b_j$ , where  $b_j \geq 0$ , and maximize the penalized log likelihood

$$l(\mathbf{y}, \boldsymbol{\mu}, \phi) - \sum_{j=1}^p q(b_j), \quad (4)$$

where  $q(b_j) = \lambda \log(b_j + \tau)$ , and  $\lambda$  and  $\tau$  are two tuning parameters. In contrast to conventional penalized GLM, we employ a non-canonical link function, does not use an

intercept, and impose a set of constraints that  $b_j \geq 0$  for  $j = 1, 2, \dots, J$ . We maximize the likelihood by iteratively updating regression coefficients  $b_j$  and dispersion parameter  $\phi$ . Following Friedman et al. [1], we approximate the likelihood part in equation (4) by a quadratic approximation:

$$l_Q(\mathbf{y}, \boldsymbol{\mu}, \phi) = - \sum_{i=1}^n w_i \left( y_i - \sum_{j=1}^p x_{ij} b_j \right)^2,$$

where  $w_i = 1 / (\hat{\mu}_i + \phi \hat{\mu}_i^2)$ , and  $\hat{\mu}_i$  is the estimate of  $\mu_i$  in the previous iteration. Then to solve  $\mathbf{b}$ , we just need to solve the following penalized least squares problem.

$$\sum_{i=1}^n w_i \left( y_i - \sum_{j=1}^p x_{ij} b_j \right)^2 + \sum_{j=1}^p q(b_j),$$

subject to the constraints of  $b_j \geq 0$  for  $1 \leq j \leq J$ . We employ a modified Iterative Adaptive Lasso (IAL) algorithm [2] to solve this problem. Given estimates of  $b_j$  ( $1 \leq j \leq p$ ),  $\phi$  can be re-estimated by maximizing the conditional likelihood of  $\phi$ .

Specifically, the implementation includes the following four levels of loops:

- OUTER LOOP: Iterate across all combinations of tuning parameter  $\lambda_n$  and  $\tau_n$ .
- MIDDLE LOOP 1: This corresponds to the loop of iteratively update  $b_j$  ( $1 \leq j \leq p$ ) and  $\phi$ . For each given  $\phi$ , we carry out the next two nested loops to estimate  $b_j$  and then re-estimate  $\phi$ .
- MIDDLE LOOP 2: This corresponds to the loop of IRLS (Iterative Re-weighted Least Squares). Update the quadratic approximation  $l_Q$  using current estimate of  $b_j$  ( $1 \leq j \leq p$ ) and  $\phi$ .
- INNER LOOP: Run the modified IAL to re-estimate  $b_j$  ( $1 \leq j \leq p$ ) on the penalized weighted least squares problem.

The modified IAL algorithm is as follows. It is different from the IAL [2] in that the regression coefficients need to be non-negative and we remove the step of estimating residual variance to improve the computational efficiency and robustness.

1. **INITIALIZATION:** initialize  $b_j$  with zero's or estimate from previous IRLS iteration, and initialize  $\kappa_j = (b_j + \tau)/\lambda$ , where  $1 \leq j \leq p$ .

2. Iterative Updates:

(a) For  $j = 1, \dots, p$ , update  $b_j$ ,

$$\begin{cases} b_j = \bar{b}_j - 1/\kappa_j & \text{if } \bar{b}_j > 1/\kappa_j \\ b_j = 0 & \text{otherwise} \end{cases},$$

where

$$\bar{b}_j = \left( \sum_{i=1}^n x_{ij}^2 \right)^{-1} \sum_{i=1}^n x_{ij} \left( y_i - \sum_{k \neq j} x_{ik} b_k \right).$$

(b) Update  $\kappa_j$ :  $\kappa_j = (b_j + \tau)/\lambda$ .

This IAL algorithm is converged if the coefficient estimates  $\hat{b}_1, \dots, \hat{b}_p$  have little change.

Tuning parameter selection is a crucial step for any penalization method. We select the tuning parameters  $\lambda$  and  $\tau$  by a two-dimensional grid search. By default, we search across 10 values of  $\lambda$  and 3 values of  $\tau$ , which are 30 tuning parameter combinations. Larger  $\lambda$  and smaller  $\tau$  leads to stronger penalty, and thus we first choose the ratio  $\lambda/\tau$ 's so that they are uniformly distributed in log scale and the largest  $\lambda/\tau$  is large enough to penalize all coefficients to 0. Then  $\tau$ 's are chosen so that they are uniformly distributed in log scale with largest  $\tau$  being 0.1. Finally for each ratio  $r = \lambda/\tau$  and for each  $\tau$ ,  $\lambda$  can be calculated as  $r\tau$ . Simulations show that the results are similar if we carry out grid search for 500 or 50 tuning parameter combinations.

Through the two-dimensional grid search, we choose the combination of  $\lambda$  and  $\tau$  that minimizes BIC or extended BIC [3] if  $n > p$  or  $n \leq p$ , respectively. If we only study the expression of known RNA isoforms,  $p$  is often smaller than  $n$  (e.g., see Supplementary Figure 4), and thus BIC is used. In contrast, if we detect de novo RNA isoforms,  $p$  is often larger than  $n$  (e.g., see Supplementary Figure 5), and thus extended BIC is used. For hypothesis testing of the isoform usage, the rule (BIC or extended BIC) is chosen based on the alternative model and the same rule is applied to the null model. More specifically, BIC is defined as

$$\text{BIC} = -2l(\hat{\Theta}) + s \log(n),$$

where  $l(\hat{\Theta})$  is log likelihood given parameter estimates  $\hat{\Theta}$ ,  $s$  is the number of non-zero coefficients after variable selection, and  $n$  is sample size. Following Chen and Chen (2012) [3], the extended BIC is defined as

$$\text{extBIC} = -2l(\hat{\Theta}) + s \log(n) + 2\gamma \log p,$$

where  $0 \leq \gamma < 1 - 1/(2\kappa)$  given  $p = O(n^\kappa)$ . In our simulation and real data studies, since we restrict the number of covariates  $p \leq 10n$ , we set  $\kappa = 1$  and choose  $\gamma = 1/2$ . Tuning parameter selection is an active research area and we do not claim our approach is optimal. However our hypothesis-testing framework rely on parametric bootstrap to resample RNA-seq read counts to calculate p-values. This resampling-based p-value calculation is robust to bias due to suboptimal tuning parameters because any bias that influences the null distribution of the test statistic can be captured through resampling. On the other hand, optimal tuning parameter selection may improve the power of our method.

## **D Mouse haloperidol treatment experiment**

Ethics Statement. All animal work was conducted in compliance with the “Guide for the Care and Use of Laboratory Animals” (Institute of Laboratory Animal Resources, National Research Council, 1996) and approved by the Institutional Animal Care and Use Committee of the University of North Carolina.

Animals. The mice used in this study were N=2 inbred C57BL/6J females (one placebo treated, one drug treated) and N=2 (129S1Sv/ImJ x PWK/PhJ)F1 females (one placebo treated, one drug treated). All animals were bred at UNC from mice that were less than 6 generations removed from founders acquired from the Jackson Laboratory (Bar Harbor, ME). Animals were maintained on a 14 hour light, 10 hour dark schedule with lights on at 0600. The housing room was maintained at 20-24C with 40-50% relative humidity. Mice were housed in standard 20cm × 30cm ventilated polysulfone cages with laboratory grade Bed-O-Cob bedding. Water and Purina Prolab RMH3000 were available ad libitum. A small section of PVC pipe was present in each cage for enrichment.

Drug treatment. Slow release haloperidol pellets (3.0 mg/kg/day; Innovative Research of America; Sarasota, FL)[4] were implanted subcutaneously with a trocar at 8 weeks of age. Blood plasma was collected via tail nick for a drug concentration assay after 30 days of exposure to haloperidol. Steady-state concentration of haloperidol within the clinically relevant range (10-50 nanomoles/L, nM, or 3.75-19 ng/ml)[5] was achieved for both drug treated animals (C57BL/6J: 19nM, (129S1Sv/ImJ x PWK/PhJ)F1: 24 nM).

Tissue collection. Mice were sacrificed at 12 weeks of age (following 30 days of drug or placebo treatment) by cervical dislocation without anesthesia to avoid its confounding effects on gene expression. Mice were removed from their home cages at 9:00 AM and sacrificed between 10:00 AM and 12:00 PM. Whole brain was rapidly collected, snap frozen in liquid nitrogen, and pulverized to a fine powder using a BioPulverizer unit (BioSpec Products, Bartlesville, OK).

RNA extraction. Total RNA was extracted from ~25 mg of tissue powder using automated instrumentation (Maxwell 16 Tissue LEV Total RNA Purification Kit, Promega, Madison, WI). RNA concentration was measured by fluorometry (Qubit 2.0 Fluorometer, Life Technologies Corp., Carlsbad, CA) and RNA quality was verified using a microfluidics



platform (Bioanalyzer, Agilent Technologies, Santa Clara, CA).

RNAseq methods. A multiplex library containing all four samples was prepared using the Illumina (San Diego, CA) TruSeq mRNA Sample Preparation Kit v2 with unique indexed adapters (GCCAAT, ACAGTG, CTTGTA, CAGATC). One microgram of total RNA per sample was used as input and the resulting libraries were quantitated using fluorometry. An Illumina HiSeq 2000 instrument was used to generate 100bp paired-end reads (2x100) in one lane of a flow cell.

For the C57BL/6J inbred mice, the mm9 reference was used for alignment. For the F1 animals, we developed a customized RNAseq alignment pipeline tailored to this experiment. Our approach considered these mice as diploid and included two separate alignments that were subsequently merged. This has the advantage of incorporating all known strain-specific genetic variants into the alignment reference sequence to improve alignment quality and to minimize bias caused by differences in genetic distance between the parental genomes to the reference sequence. First, reads from the F1 hybrids were aligned to the appropriate 'pseudogenomes' representing each of the parental genomes using TopHat[6] (v1.4, default parameters including segment length 25 bp, 2 mismatches allowed per segment, 2 mismatches total allowed per 100 bp read, and maximum indel of 3 bases). Pseudogenomes are approximations constructed by incorporating all known SNPs and indels into the C57BL/6 genome (mm9)[7]. We included all variants reported by a large-scale sequencing effort that included 129S1Sv/ImJ and PWK/PhJ[8] (June 2011 release). Second, we mapped coordinates from the pseudogenome aligned reads to mm9 coordinates. This involved updating the alignment positions and rewriting the CIGAR strings of each aligned read[9]. This was necessary as indels alter the pseudogenome coordinates relative to mm9. Third, we annotated each aligned read to indicate the numbers of maternal and paternal alleles (SNPs and indels) observed in a given read and its paired-end mate. Considering the paired-end mates allowed the use of more paired-end reads for ASE. Finally, alignments to maternal and paternal pseudogenomes were merged by computing the proper union of the separate alignments (i.e., the two alignments were combined such that a read aligning to the same position in both alignments was counted once).

## E Massively Parallel Computing for ISODETECTOR

In practice, the penalized estimation in ISODETECTOR is performed on a grid of  $\lambda$  and  $\tau$  and the best estimate is chosen according to certain model selection criterion such as BIC. For hypothesis testing purpose, this tuning process has to be done on thousands of bootstrap samples for each gene, which incurs formidable computation burden in real applications. Massively parallel computing based on graphical processing units (GPUs) provides a promising solution. However the coordinate descent based algorithm does not particularly suit the massively parallel computing architecture. Here we propose an algorithm based on the minorization-maximization (MM) principle. Like EM algorithm, MM algorithm always increases the objective value and thus is numerically stable. Furthermore, MM algorithm tends to separate variables, making massively parallel computing feasible in high dimensional optimization problems [10].

Consider the log likelihood of a negative binomial model with response vector  $\mathbf{y} \in \mathbb{N}^n$  and design matrix  $\mathbf{X} \in \mathbb{R}^{n \times p}$

$$\ell(\mathbf{b}, \phi | \mathbf{y}, \mathbf{X}) = \sum_{i=1}^n \left[ \log \frac{(\phi^{-1})_{(y_i)}}{y_i!} + y_i \log(\phi \mathbf{x}_i^T \mathbf{b}) - (y_i + \phi^{-1}) \log(1 + \phi \mathbf{x}_i^T \mathbf{b}) \right],$$

where  $\phi$  is the overdispersion parameter of negative binomial distribution, and  $(\phi^{-1})_{(y_i)}$  denotes the rising factorial  $\prod_{k=0}^{y_i-1} (\phi^{-1} + k) = \phi^{-1}(\phi^{-1} + 1) \dots (\phi^{-1} + y_i - 1)$ . We assume that entries of  $\mathbf{X}$  are nonnegative which is true for isoform estimation problem. To simultaneously achieve isoform selection and estimation, ISODETECTOR relies on log penalized estimation due to its attractive properties. In particular we seek to maximize the penalized objective function

$$f(\mathbf{b}, \phi) = \ell(\mathbf{b}, \phi | \mathbf{y}, \mathbf{X}) - \sum_{j=1}^p \lambda \log(b_j + \tau), \quad (5)$$

where  $\lambda$  and  $\tau$  are two tuning parameters, subject to the nonnegativity constraint  $b_j \geq 0$ .

The derivation of MM algorithm for maximizing (5) relies on simple inequalities [11]. The strategy is to minorize term by term. By concavity of log function,

$$\log(\mathbf{x}_i^T \mathbf{b}) = \log \left( \sum_j x_{ij} b_j^{(t)} \right) \geq \sum_j w_{ij}^{(t)} \log b_j + c^{(t)},$$

where the superscript  $t$  indicates iteration number and  $c^{(t)}$  is a constant irrelevant to optimization, and

$$w_{ij}^{(t)} = \frac{x_{ij}b_j^{(t)}}{\sum_j x_{ij}b_j^{(t)}}.$$

By the convexity of negative log function, we apply supporting hyperplane inequality to obtain minorizations

$$\begin{aligned} -\log(1 + \phi \mathbf{x}_i^\top \mathbf{b}) &\geq -\frac{\phi \mathbf{x}_i^\top \mathbf{b}}{1 + \phi \mathbf{x}_i^\top \mathbf{b}^{(t)}} + c^{(t)} \\ -\log(b_j + \tau) &\geq -\frac{b_j}{b_j^{(t)} + \tau} + c^{(t)}. \end{aligned}$$

Combining above pieces, we obtain an overall minorization function to the objective function (5)

$$\begin{aligned} &g(\mathbf{b}|\mathbf{b}^{(t)}, \phi^{(t)}) \\ &= \sum_{i=1}^n \left[ y_i \sum_j w_{ij}^{(t)} \log b_j - \left( \frac{y_i + (\phi^{(t)})^{-1}}{1 + \phi^{(t)} \mathbf{x}_i^\top \mathbf{b}^{(t)}} \right) \phi^{(t)} \sum_j x_{ij} b_j \right] - \lambda \sum_j \frac{b_j}{b_j^{(t)} + \tau} + c^{(t)} \\ &= \sum_j \left[ \left( \sum_i y_i w_{ij}^{(t)} \right) \log b_j - \left( \sum_i \frac{x_{ij}(y_i \phi^{(t)} + 1)}{1 + \phi^{(t)} \mathbf{x}_i^\top \mathbf{b}^{(t)}} + \frac{\lambda}{b_j^{(t)} + \tau} \right) b_j \right] + c^{(t)}. \end{aligned}$$

It is easy to check that

$$\begin{aligned} g(\mathbf{b}|\mathbf{b}^{(t)}, \phi^{(t)}) &\leq f(\mathbf{b}, \phi) \quad \text{for all } \mathbf{b} \\ g(\mathbf{b}^{(t)}|\mathbf{b}^{(t)}, \phi^{(t)}) &= f(\mathbf{b}^{(t)}, \phi^{(t)}). \end{aligned}$$

Therefore maximizing the minorizing function  $g(\mathbf{b}|\mathbf{b}^{(t)}, \phi^{(t)})$  always increases the objective function

$$f(\mathbf{b}^{(t+1)}, \phi^{(t)}) \geq g(\mathbf{b}^{(t+1)}|\mathbf{b}^{(t)}, \phi^{(t)}) \geq g(\mathbf{b}^{(t)}|\mathbf{b}^{(t)}, \phi^{(t)}) = f(\mathbf{b}^{(t)}, \phi^{(t)}).$$

Setting derivative of  $g(\mathbf{b}|\mathbf{b}^{(t)}, \phi^{(t)})$  to zero yields an extremely simple update

$$b_j^{(t+1)} = \frac{\sum_i y_i w_{ij}^{(t)}}{\sum_i \frac{x_{ij}(y_i \phi^{(t)} + 1)}{1 + \phi^{(t)} \mathbf{x}_i^\top \mathbf{b}^{(t)}} + \frac{\lambda}{b_j^{(t)} + \tau}}, \quad j = 1, \dots, p, \quad (6)$$

involving only trivial algebra. All parameters  $b_j$  are separated and thus updated simultaneously, matching perfectly with the massively parallel architecture of GPUs. The nonnegativity constraints  $b_j \geq 0$  are also preserved in the update (6). Whenever  $b_j^{(0)}$  are positive, all subsequent iterates  $b_j^{(t)}$  will always be nonnegative. Effects of the tuning parameters  $\lambda$  and  $\tau$  are clear: large  $\lambda$  and small  $\tau$  cause more shrinkage and vice versa. Furthermore, the log penalty penalizes small  $b_j$  more heavily than large  $b_j$ , a desired property the lasso penalty lacks.

The update (6) always increases the objective value. However, it does not update the overdispersion parameter  $\phi$ . In practice, we update  $\phi$  after every a few (e.g., five) updates of  $\mathbf{b}$  by (6). Updating of  $\phi$  can be done by either Newton's steps or by invoking MM algorithm again. Both are simple because it is a smooth univariate optimization problem. For brevity the details are omitted here.

## F Supplementary Figures

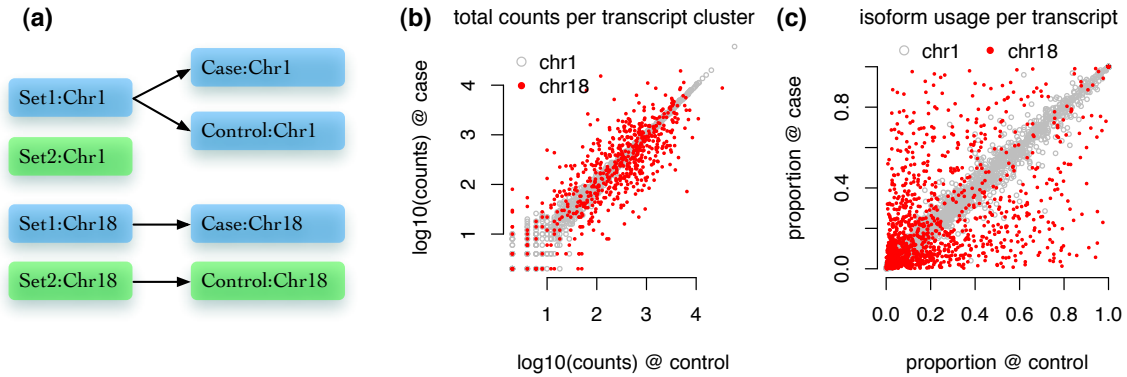

Figure 2: A summary of simulated data. We first simulated  $\sim 2$  million 76+76bps paired-end reads for data set 1 and data set 2, based on the transcriptome annotation of chromosome 1 and 18 of mouse genome. The expression of any gene/transcript are independent between data set 1 and data set 2. Then as illustrated in (a), a case and a control sample were generated as follows. For chromosome 1, the sequence fragments of simulation set 1 were randomly split into the case and control samples. For chromosome 18, half of the sequence fragments from set 1 were selected for case and half of the sequence fragments from set 2 were selected for control. Therefore, comparing case and control, all the transcripts in chromosome 1 were equivalently expressed and all the transcripts in chromosome 18 were differentially expressed, either in terms of total expression (b) or isoform usage (c). (a) Comparison of the total number of fragments per transcript cluster between the case and the control samples. (c) Comparison of isoform usage of each transcript between the case and the control samples. Here isoform usage is quantified by the ratio of the number of sequence fragments of one transcript over the total number of fragments of the corresponding transcript cluster.

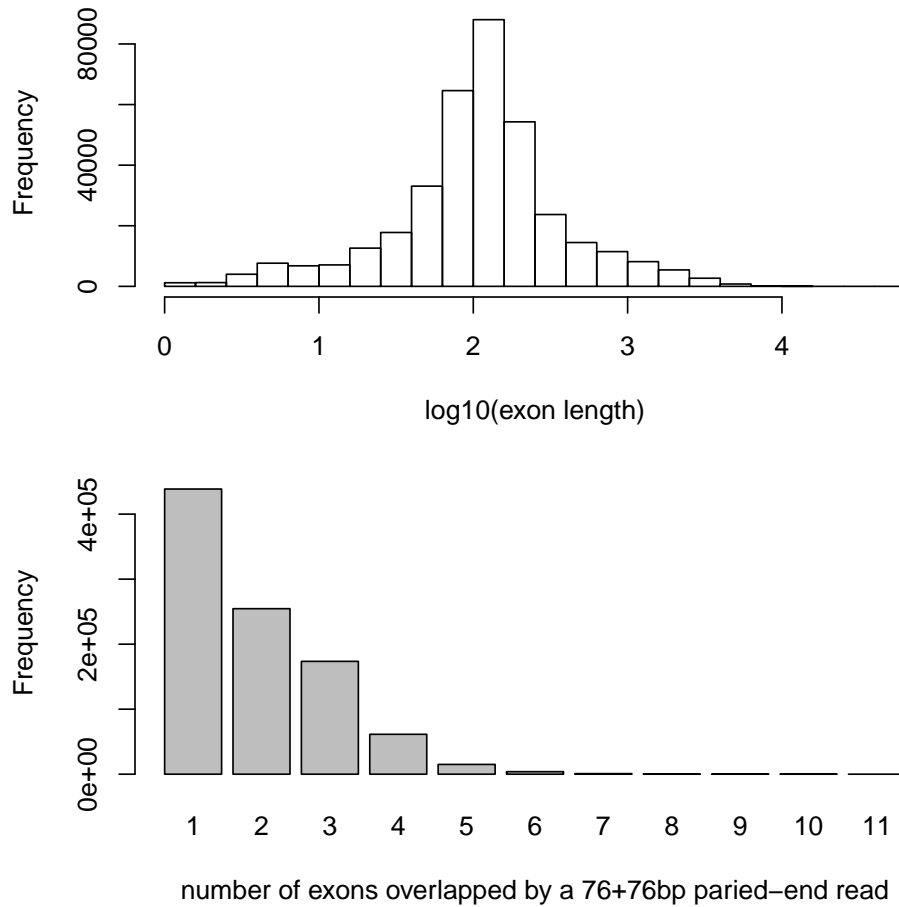

Figure 3: Upper panel shows the distribution of the lengths of non-overlapping exons. Lower panel shows the distribution of the number of exons overlapped by each paired end read. A paired-end read overlaps an exon if at least one base pair of either end of the read overlap with the exon. About 46%, 27%, and 18% of the reads overlap with only one, two, or three exons.

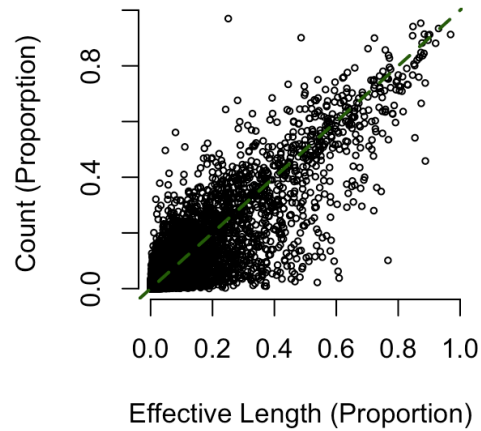

Figure 4: The relation between the effective length of an exon set (divided by the total effective length of the transcript cluster to which the exon belongs) and the proportion of RNA-seq fragments mapped to this exon set in our simulated data. The correlation between them is 0.88. Because different transcript clusters have different expression abundance, we compared read count and effective length as the proportions over the corresponding transcript cluster. Note that the effective length is calculated while assuming all the exons in an exon set are contiguous, which may not be true. Therefore the results here can only be viewed as an approximation.

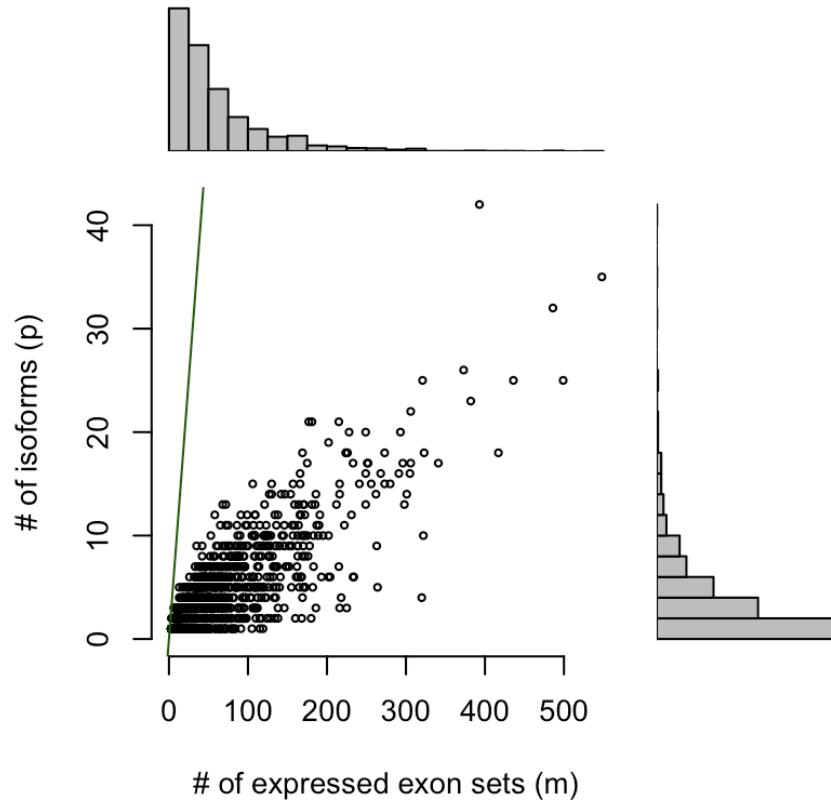

Figure 5: An illustration of the dimension of the isoform selection problem when we use known transcriptome annotation. For each transcript cluster, we consider a variable selection problem where sample size  $n$  is the number of expressed exon sets, and the number of covariates  $p$  is the number of (candidate) isoforms. The solid line indicates  $p = n$ .



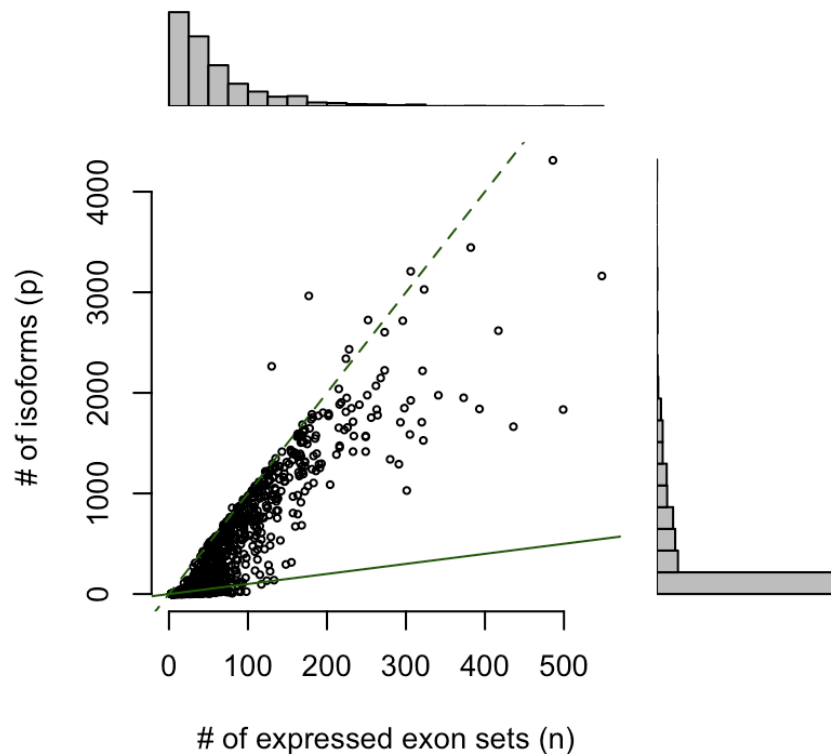

Figure 6: An illustration of the dimension of the isoform selection problem when there is no isoform annotation. For each gene (or transcript cluster), we consider a variable selection problem where sample size  $n$  is the number of expressed exon sets, and the number of covariates  $p$  is the number of (candidate) isoforms. The solid line indicates  $p = n$ , and the broken line indicates  $p = 10n$ . In our implementation, we choose the number of candidate isoforms so that  $p \leq 10n$  approximately. Users can loose this restriction with price of increasing computational cost. Our experience is that IsoDetector runs well for  $p \leq 100n$ .

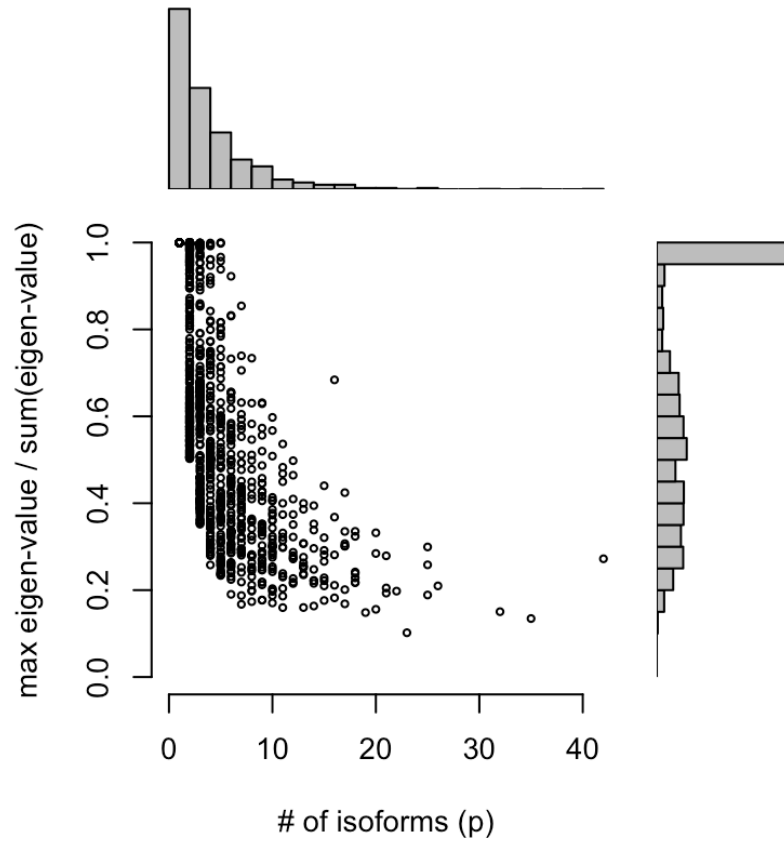

Figure 7: An illustration of the correlation among the isoforms of each transcript cluster when we use known isoform annotation. Each point indicates a transcript cluster where x-axis is the number of isoforms and y-axis is the proportion of variance explained by the first principal component.

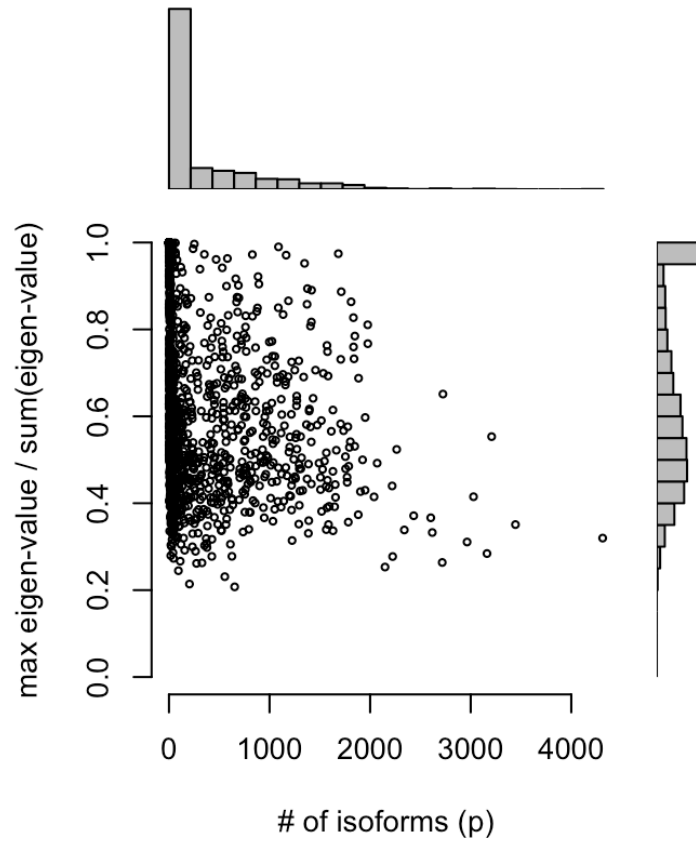

Figure 8: An illustration of the correlation among the isoforms of each transcript cluster when there is no isoform annotation. Each point indicates a transcript cluster where x-axis is the number of isoforms and y-axis is the proportion of variance explained by the first principal component.

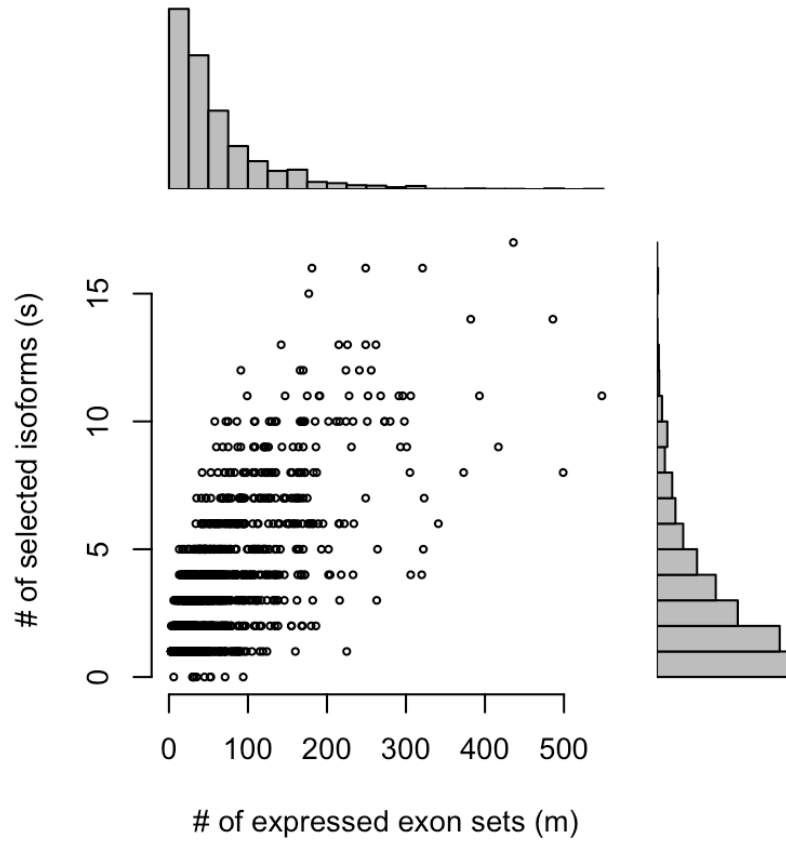

Figure 9: An illustration of the number of isoforms selected by IsoDetector when we choose the candidate isoforms based on the known isoform annotation.

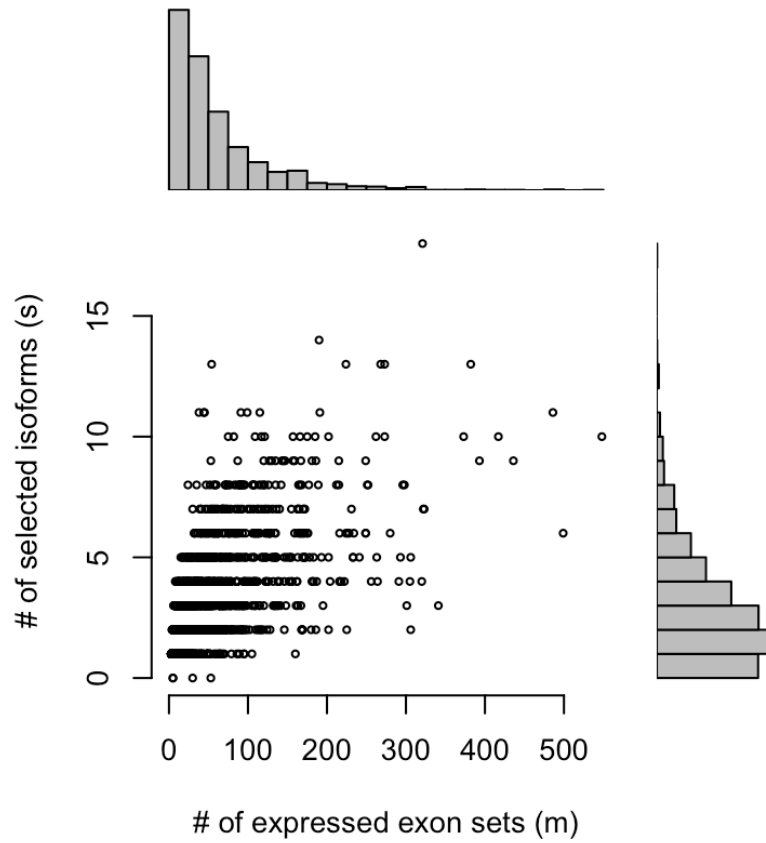

Figure 10: An illustration of the number of isoforms selected by IsoDetector when we choose the candidate isoforms without using any isoform annotation.

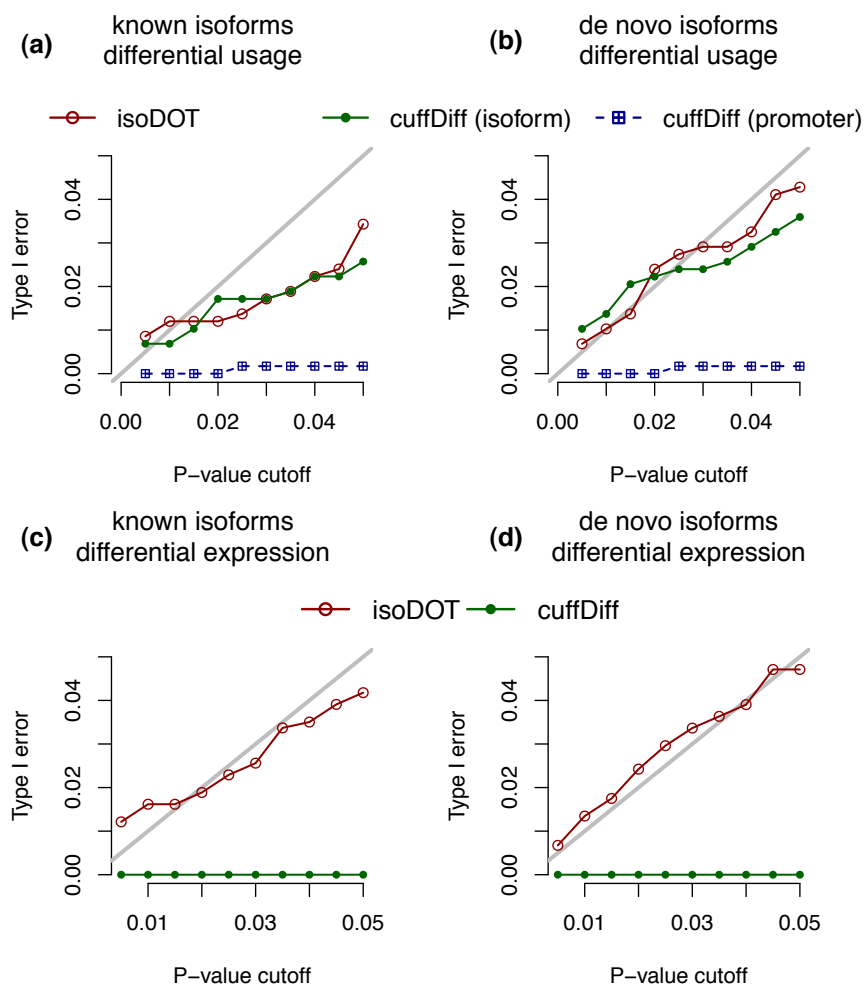

Figure 11: Compare the type I error of IsoDOT and Cuffdiff2 for detesting genes with differential isoform usage (a-b) or differential expression (c-d), while transcriptome annotation is known (a,c) or not (b,d). For the case of differential isoform usage, cufflinks provides results for “isoform” and “promoter”, where the former is for isoform sharing a TSS, and the latter is for differential usage of TSSs. For the “isoform” case, we have collapsed the p-values of multiple tests of a gene by taking minimum, thus it leads to an over-estimate of type I error.

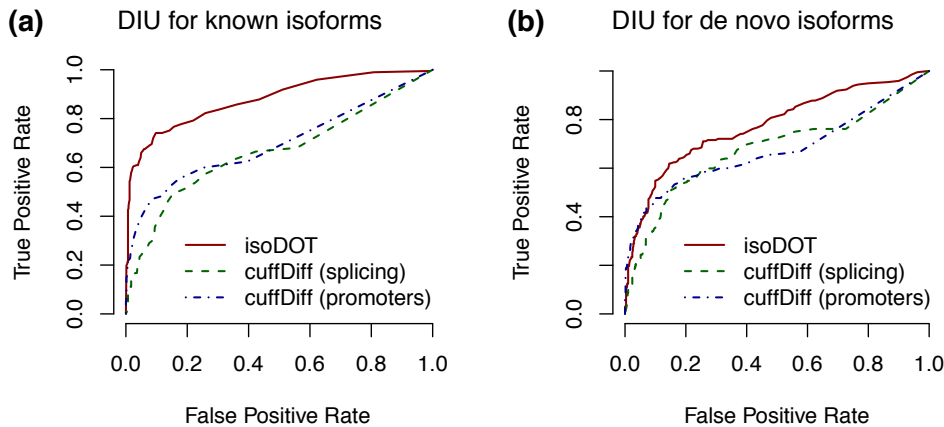

Figure 12: Compare the results of IsoDOT and Cuffdiff2 by ROC curves. The ROC curves compare two methods across a wide range of p-value cutoffs. If one method has a calibration issue (e.g., p-value is larger than it should be) but still ranks the genes correctly, it would perform well judged by ROC curve. The results shown here demonstrate that the IsoDOT still performs better than Cuffdiff2 even if we allow the results of Cuffdiff2 to be calibrated.

| Category      | Term                         | Count | List Total | Pop Hits | Pop Total | Bonferroni |
|---------------|------------------------------|-------|------------|----------|-----------|------------|
| GOTERM_CC_FAT | GO:0043005~neuron projection | 12    | 71         | 245      | 12504     | 1.78E-05   |
| GOTERM_CC_FAT | GO:0042995~cell projection   | 14    | 71         | 575      | 12504     | 2.66E-03   |
| GOTERM_CC_FAT | GO:0030424~axon              | 6     | 71         | 107      | 12504     | 5.53E-02   |

Figure 13: DAVID functional category enrichments for DIU genes (with transcriptome annotation).

| Category      | Term                                             | Count | List Total | Pop Hits | Pop Total | Bonferroni |
|---------------|--------------------------------------------------|-------|------------|----------|-----------|------------|
| GOTERM_BP_FAT | GO:0006470~protein amino acid dephosphorylation  | 5     | 75         | 114      | 13588     | 9.18E-01   |
| GOTERM_BP_FAT | GO:0016311~dephosphorylation                     | 5     | 75         | 141      | 13588     | 9.95E-01   |
| GOTERM_MF_FAT | GO:0004721~phosphoprotein phosphatase activity   | 5     | 74         | 152      | 13288     | 8.95E-01   |
| GOTERM_MF_FAT | GO:0004725~protein tyrosine phosphatase activity | 4     | 74         | 101      | 13288     | 9.85E-01   |
| GOTERM_MF_FAT | GO:0016791~phosphatase activity                  | 5     | 74         | 238      | 13288     | 1.00E+00   |

Figure 14: DAVID functional category enrichments for DIE genes (with transcriptome annotation).

| Category      | Term                                                | Count | List Total | Pop Hits | Pop Total | Bonferroni |
|---------------|-----------------------------------------------------|-------|------------|----------|-----------|------------|
| GOTERM_MF_FAT | GO:0030955~potassium ion binding                    | 5     | 65         | 118      | 13288     | 3.77E-01   |
| GOTERM_BP_FAT | GO:0006813~potassium ion transport                  | 5     | 68         | 160      | 13588     | 9.97E-01   |
| GOTERM_MF_FAT | GO:0005249~voltage-gated potassium channel activity | 4     | 65         | 99       | 13288     | 9.00E-01   |
| GOTERM_BP_FAT | GO:0015672~monovalent inorganic cation transport    | 6     | 68         | 303      | 13588     | 1.00E+00   |
| GOTERM_MF_FAT | GO:0031420~alkali metal ion binding                 | 5     | 65         | 206      | 13288     | 9.64E-01   |
| GOTERM_MF_FAT | GO:0022843~voltage-gated cation channel activity    | 4     | 65         | 128      | 13288     | 9.90E-01   |

Figure 15: DAVID functional category enrichments for DIU genes (without transcriptome annotation).

| Category      | Term                            | Count | List Total | Pop Hits | Pop Total | Bonferroni |
|---------------|---------------------------------|-------|------------|----------|-----------|------------|
| GOTERM_BP_FAT | GO:0016477~cell migration       | 6     | 76         | 240      | 13588     | 9.99E-01   |
| GOTERM_BP_FAT | GO:0051674~localization of cell | 6     | 76         | 284      | 13588     | 1.00E+00   |
| GOTERM_BP_FAT | GO:0048870~cell motility        | 6     | 76         | 284      | 13588     | 1.00E+00   |
| GOTERM_BP_FAT | GO:0006928~cell motion          | 6     | 76         | 367      | 13588     | 1.00E+00   |

Figure 16: DAVID functional category enrichments for DIE genes (without transcriptome annotation).

#### **cuffdiff\_knownIso\_promoter\_top100\_DAVID**

| Category      | Term                                                  | Count | List Total | Pop Hits | Pop Total | Bonferroni |
|---------------|-------------------------------------------------------|-------|------------|----------|-----------|------------|
| GOTERM_MF_FAT | GO:0003677~DNA binding                                | 21    | 76         | 1781     | 13288     | 2.7E-01    |
| GOTERM_BP_FAT | GO:0045449~regulation of transcription                | 21    | 69         | 2227     | 13588     | 9.5E-01    |
| GOTERM_BP_FAT | GO:0006350~transcription                              | 18    | 69         | 1772     | 13588     | 9.6E-01    |
| GOTERM_MF_FAT | GO:0003700~transcription factor activity              | 11    | 76         | 776      | 13288     | 8.9E-01    |
| GOTERM_BP_FAT | GO:0006355~regulation of transcription, DNA-dependent | 15    | 69         | 1465     | 13588     | 1.0E+00    |
| GOTERM_BP_FAT | GO:0051252~regulation of RNA metabolic process        | 15    | 69         | 1488     | 13588     | 1.0E+00    |

#### **cuffdiff\_knownIso\_splicing\_top100\_DAVID**

| Category      | Term                                             | Count | List Total | Pop Hits | Pop Total | Bonferroni |
|---------------|--------------------------------------------------|-------|------------|----------|-----------|------------|
| GOTERM_BP_FAT | GO:0006650~glycerophospholipid metabolic process | 4     | 67         | 88       | 13588     | 1.0E+00    |
| GOTERM_BP_FAT | GO:0046486~glycerolipid metabolic process        | 4     | 67         | 129      | 13588     | 1.0E+00    |
| GOTERM_BP_FAT | GO:0030384~phosphoinositide metabolic process    | 3     | 67         | 63       | 13588     | 1.0E+00    |
| GOTERM_BP_FAT | GO:0006644~phospholipid metabolic process        | 4     | 67         | 163      | 13588     | 1.0E+00    |
| GOTERM_BP_FAT | GO:0019637~organophosphate metabolic process     | 4     | 67         | 176      | 13588     | 1.0E+00    |

#### **cuffdiff\_unknownIso\_promoter\_top100\_DAVID**

| Category      | Term                                                     | Count | List Total | Pop Hits | Pop Total | Bonferroni |
|---------------|----------------------------------------------------------|-------|------------|----------|-----------|------------|
| GOTERM_MF_FAT | GO:0005083~small GTPase regulator activity               | 7     | 75         | 223      | 13288     | 2.7E-01    |
| GOTERM_BP_FAT | GO:0051336~regulation of hydrolase activity              | 6     | 69         | 196      | 13588     | 8.0E-01    |
| GOTERM_MF_FAT | GO:0005099~Ras GTPase activator activity                 | 4     | 75         | 65       | 13288     | 7.0E-01    |
| GOTERM_BP_FAT | GO:0043087~regulation of GTPase activity                 | 4     | 69         | 93       | 13588     | 1.0E+00    |
| GOTERM_BP_FAT | GO:0046578~regulation of Ras protein signal transduction | 5     | 69         | 181      | 13588     | 1.0E+00    |
| GOTERM_MF_FAT | GO:0030695~GTPase regulator activity                     | 7     | 75         | 361      | 13288     | 9.6E-01    |

#### **cuffdiff\_unknownIso\_splicing\_top100\_DAVID**

| Category      | Term                                        | Count | List Total | Pop Hits | Pop Total | Bonferroni |
|---------------|---------------------------------------------|-------|------------|----------|-----------|------------|
| GOTERM_BP_FAT | GO:0000902~cell morphogenesis               | 6     | 63         | 309      | 13588     | 1.0E+00    |
| GOTERM_BP_FAT | GO:0048858~cell projection morphogenesis    | 5     | 63         | 202      | 13588     | 1.0E+00    |
| GOTERM_BP_FAT | GO:0030030~cell projection organization     | 6     | 63         | 319      | 13588     | 1.0E+00    |
| GOTERM_BP_FAT | GO:0032990~cell part morphogenesis          | 5     | 63         | 212      | 13588     | 1.0E+00    |
| GOTERM_BP_FAT | GO:0032989~cellular component morphogenesis | 6     | 63         | 351      | 13588     | 1.0E+00    |
| GOTERM_BP_FAT | GO:0048812~neuron projection morphogenesis  | 4     | 63         | 176      | 13588     | 1.0E+00    |

Figure 17: DAVID functional category enrichments for the results from Cuffdiff.



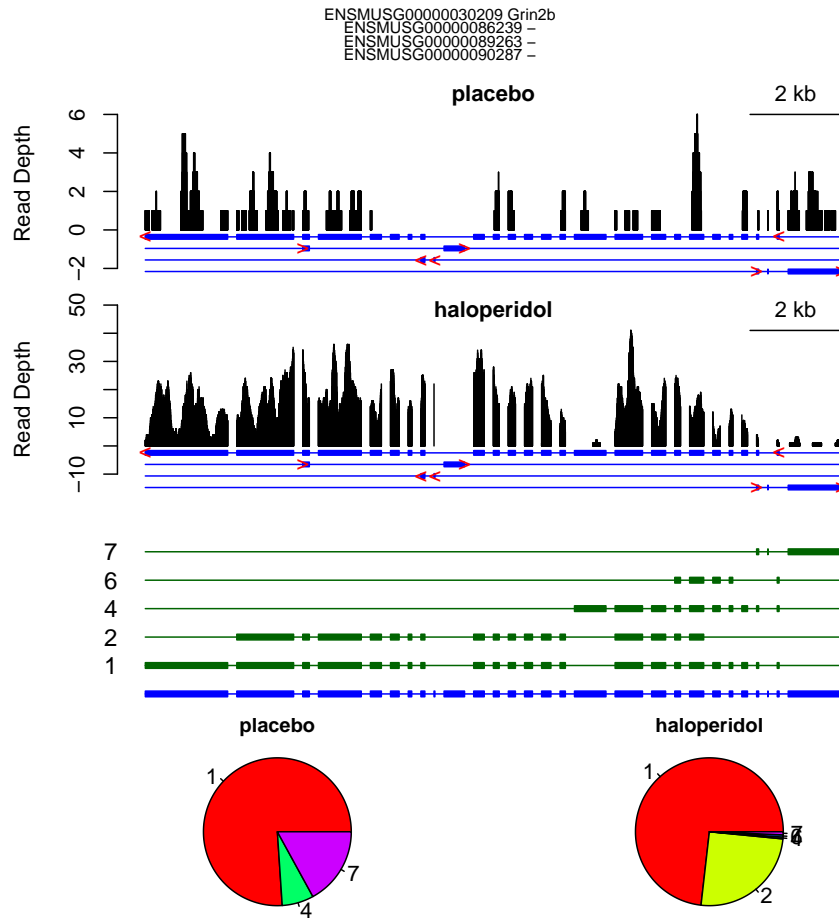

Figure 18: Differential isoform usage of gene *Grin2b* between two C57BL/6 mice with haloperidol or placebo treatment. Note *Grin2b* belongs to a transcript cluster with four genes. However, the other three genes are short and contribute little if any signal of differential isoform usage.

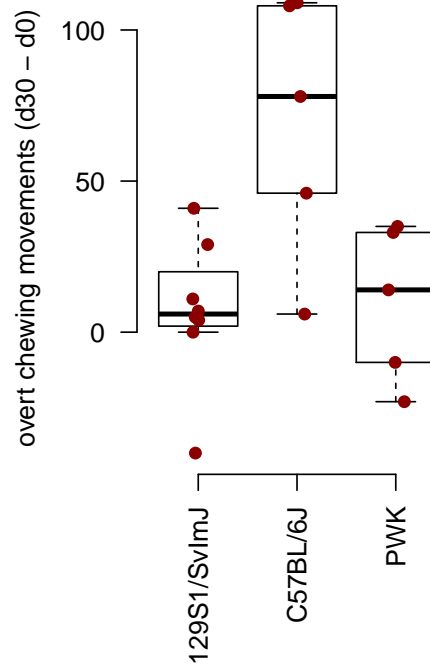

Figure 19: Change of overt chewing movements for three inbred strains between day 0 and day 30 after haloperidol treatment. See Crowley et al. [12] for more details of the experiment and the results of other phenotypic outcomes.

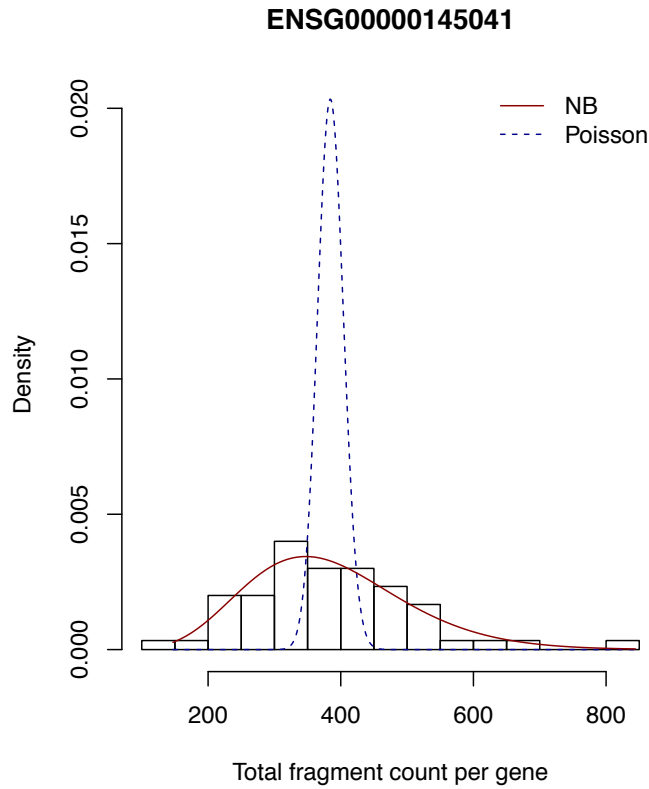

Figure 20: An example to show that negative binomial distribution can provide adequate fit to RNA-seq fragment count data whereas Poisson distribution assumption leads to severe underestimate of variance. The RNA-seq data used in this example are the RNA-seq fragment count for gene VPRBP (Vpr (HIV-1) binding protein, ensembl ID: ENSG00000145041) from 50 HapMap CEU samples [13]. The MLE of the two distributions were obtained using R function `glm` and `glm.nb`, respectively, after correction for read-depth.

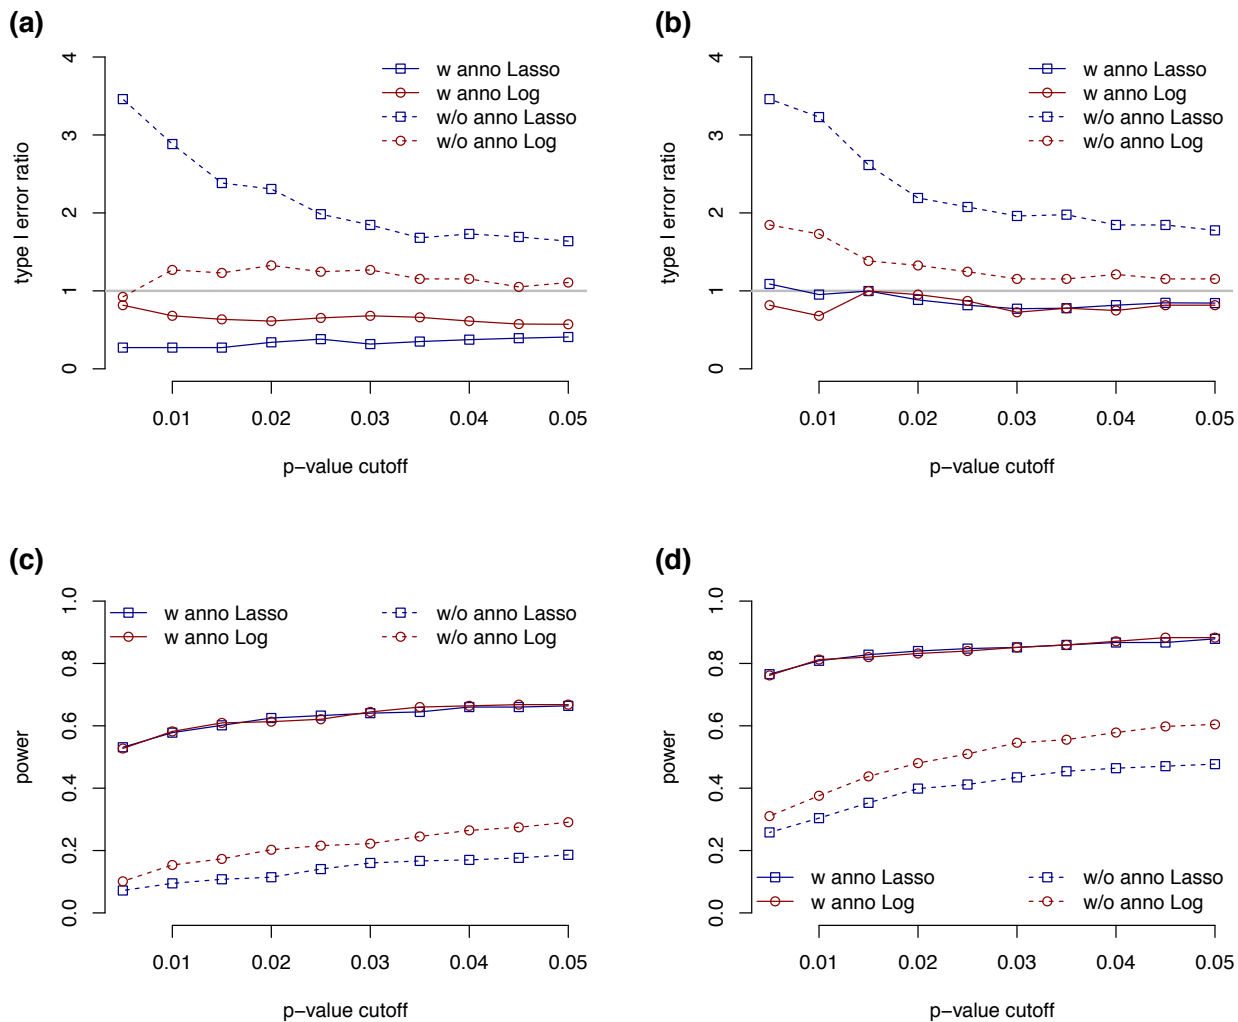

Figure 21: Compare type I error and power when we use the Lasso penalty or the Log penalty in IsoDOT. (a) Type I for DIU test. (b) Type I error for DIE test. (c) Power for DIU test. (d) Power for DIE test. In panel (a) and (b), the y-axis is type I error ratio, which is the ratio of observed type I error rate divided by the corresponding p-value cutoff (x-axis), which is the expected type I error rate.

Table 1: Read depth of the RNA-seq data in mouse haloperidol treatment study. Each sequence fragment was sequenced on both ends by 93-100bp. The first four rows show the information of four mince and the last four rows are for allele-specific RNA-seq reads from the two F1 mice.

| Sample ID | Genetic background | Treatment   | Total number of mapped reads | Number of fragments passed QC and mapped to exonic regions |
|-----------|--------------------|-------------|------------------------------|------------------------------------------------------------|
| BB1050    | C57BL/6J           | placebo     | 21,482,924                   | 8,337,872                                                  |
| BB1068    | C57BL/6J           | haloperidol | 27,178,749                   | 10,486,170                                                 |
| CG0069    | 129×PWK            | placebo     | 24,014,041                   | 10,476,460                                                 |
| CG0077    | 129×PWK            | haloperidol | 20,365,336                   | 8,871,864                                                  |
| CG0069    | 129 @ 129×PWK      | placebo     | 4,667,545                    | 1,953,335                                                  |
| CG0069    | PWK @ 129×PWK      | placebo     | 4,605,879                    | 1,931,791                                                  |
| CG0077    | 129 @ 129×PWK      | haloperidol | 3,993,348                    | 1,668,243                                                  |
| CG0077    | PWK @ 129×PWK      | haloperidol | 3,957,371                    | 1,654,705                                                  |

Table 2: Top 100 genes identified from differential isoform usage (DU only) analysis comparing two C57BL/6J mice with haloperidol or placebo treatments.

| Ensembl ID         | symbol   | name                                                                                 |
|--------------------|----------|--------------------------------------------------------------------------------------|
| ENSMUSG00000040537 | Adam22   | a disintegrin and metallopeptidase domain 22                                         |
| ENSMUSG00000020431 | Adcy1    | adenylate cyclase 1                                                                  |
| ENSMUSG00000049470 | Aff4     | AF4/FMR2 family, member 4                                                            |
| ENSMUSG00000061603 | Akap6    | A kinase (PRKA) anchor protein 6                                                     |
| ENSMUSG00000040407 | Akap9    | A kinase (PRKA) anchor protein (yotiao) 9                                            |
| ENSMUSG00000069601 | Ank3     | ankyrin 3, epithelial                                                                |
| ENSMUSG00000071176 | Arhgef10 | Rho guanine nucleotide exchange factor (GEF) 10                                      |
| ENSMUSG00000059495 | Arhgef12 | Rho guanine nucleotide exchange factor (GEF) 12                                      |
| ENSMUSG0000002343  | Armc6    | armadillo repeat containing 6                                                        |
| ENSMUSG00000020788 | Atp2a3   | ATPase, Ca <sup>++</sup> transporting, ubiquitous                                    |
| ENSMUSG00000003604 | Aven     | apoptosis, caspase activation inhibitor                                              |
| ENSMUSG00000048251 | Bcl11b   | B-cell leukemia/lymphoma 11B                                                         |
| ENSMUSG00000049658 | Bdp1     | B double prime 1, subunit of RNA polymerase III transcription initiation factor IIIB |
| ENSMUSG00000042460 | C1galt1  | core 1 synthase, glycoprotein-N-acetylgalactosamine 3-beta-galactosyltransferase, 1  |

*Continued on next page*

Table 2 – *Continued from previous page*

| <b>Ensembl ID</b>  | <b>symbol</b> | <b>name</b>                                                                 |
|--------------------|---------------|-----------------------------------------------------------------------------|
| ENSMUSG00000039983 | Ccdc32        | coiled-coil domain containing 32                                            |
| ENSMUSG00000033671 | Cep350        | centrosomal protein 350                                                     |
| ENSMUSG00000021097 | Clmn          | calmin                                                                      |
| ENSMUSG00000060924 | Csmd1         | CUB and Sushi multiple domains 1                                            |
| ENSMUSG00000048796 | Cyb561d1      | cytochrome b-561 domain containing 1                                        |
| ENSMUSG00000017999 | Ddx27         | DEAD (Asp-Glu-Ala-Asp) box polypeptide 27                                   |
| ENSMUSG00000037426 | Depdc5        | DEP domain containing 5                                                     |
| ENSMUSG00000024456 | Diap1         | diaphanous homolog 1 (Drosophila)                                           |
| ENSMUSG00000045103 | Dmd           | dystrophin, muscular dystrophy                                              |
| ENSMUSG00000041268 | Dmxl2         | Dmx-like 2                                                                  |
| ENSMUSG00000039716 | Dock3         | dedicator of cyto-kinesis 3                                                 |
| ENSMUSG00000036270 | Edc4          | enhancer of mRNA decapping 4                                                |
| ENSMUSG00000028760 | Eif4g3        | eukaryotic translation initiation factor 4 gamma, 3                         |
| ENSMUSG00000039167 | Eltl1         | EGF, latrophilin seven transmembrane domain containing 1                    |
| ENSMUSG00000004267 | Eno2          | enolase 2, gamma neuronal                                                   |
| ENSMUSG00000032314 | Etfa          | electron transferring flavoprotein, alpha polypeptide                       |
| ENSMUSG00000010517 | Faf1          | Fas-associated factor 1                                                     |
| ENSMUSG00000025262 | Fam120c       | family with sequence similarity 120, member C                               |
| ENSMUSG00000025153 | Fasn          | fatty acid synthase                                                         |
| ENSMUSG00000070733 | Fryl          | furry homolog-like (Drosophila)                                             |
| ENSMUSG00000039801 | Gm5906        | RIKEN cDNA 2410089E03 gene                                                  |
| ENSMUSG00000031210 | Gpr165        | G protein-coupled receptor 165                                              |
| ENSMUSG00000020176 | Grb10         | growth factor receptor bound protein 10                                     |
| ENSMUSG00000030209 | Grin2b        | glutamate receptor, ionotropic, NMDA2B (epsilon 2)                          |
| ENSMUSG00000031584 | Gsr           | glutathione reductase                                                       |
| ENSMUSG00000006930 | Hap1          | huntingtin-associated protein 1                                             |
| ENSMUSG00000029104 | Htt           | huntingtin                                                                  |
| ENSMUSG00000009828 | Ick           | intestinal cell kinase                                                      |
| ENSMUSG00000023830 | Igf2r         | insulin-like growth factor 2 receptor                                       |
| ENSMUSG00000042599 | Jhdm1d        | jumonji C domain-containing histone demethylase 1 homolog D (S. cerevisiae) |
| ENSMUSG00000024410 | K100          | RIKEN cDNA 3110002H16 gene                                                  |
| ENSMUSG00000016946 | Kctd5         | potassium channel tetramerisation domain containing 5                       |
| ENSMUSG00000063077 | Kif1b         | kinesin family member 1B                                                    |
| ENSMUSG00000027550 | Lrrcc1        | leucine rich repeat and coiled-coil domain containing 1                     |
| ENSMUSG00000028649 | Macf1         | microtubule-actin crosslinking factor 1                                     |
| ENSMUSG00000036278 | Macrocl1      | MACRO domain containing 1                                                   |

*Continued on next page*

Table 2 – *Continued from previous page*

| <b>Ensembl ID</b>  | <b>symbol</b> | <b>name</b>                                                                                                      |
|--------------------|---------------|------------------------------------------------------------------------------------------------------------------|
| ENSMUSG00000008763 | Man1a2        | mannosidase, alpha, class 1A, member 2                                                                           |
| ENSMUSG00000059474 | Mbtd1         | mbt domain containing 1                                                                                          |
| ENSMUSG00000020184 | Mdm2          | transformed mouse 3T3 cell double minute 2                                                                       |
| ENSMUSG00000024294 | Mib1          | mindbomb homolog 1 (Drosophila)                                                                                  |
| ENSMUSG00000038056 | Mll3          | myeloid/lymphoid or mixed-lineage leukemia 3                                                                     |
| ENSMUSG00000022889 | Mrpl39        | mitochondrial ribosomal protein L39                                                                              |
| ENSMUSG00000033004 | Mycbp2        | MYC binding protein 2                                                                                            |
| ENSMUSG00000030739 | Myh14         | myosin, heavy polypeptide 14                                                                                     |
| ENSMUSG00000034593 | Myo5a         | myosin VA                                                                                                        |
| ENSMUSG00000027799 | Nbea          | neurobeachin                                                                                                     |
| ENSMUSG00000020716 | Nf1           | neurofibromatosis 1                                                                                              |
| ENSMUSG00000038495 | Otud7b        | OTU domain containing 7B                                                                                         |
| ENSMUSG00000021140 | Pcnx          | pecanex homolog (Drosophila)                                                                                     |
| ENSMUSG00000002265 | Peg3          | paternally expressed 3                                                                                           |
| ENSMUSG00000028085 | Pet112l       | PET112-like (yeast)                                                                                              |
| ENSMUSG00000039943 | Plcb4         | phospholipase C, beta 4                                                                                          |
| ENSMUSG00000032827 | Ppp1r9a       | protein phosphatase 1, regulatory (inhibitor) subunit 9A                                                         |
| ENSMUSG00000038976 | Ppp1r9b       | protein phosphatase 1, regulatory subunit 9B                                                                     |
| ENSMUSG00000003099 | Ppp5c         | protein phosphatase 5, catalytic subunit                                                                         |
| ENSMUSG00000039410 | Prdm16        | PR domain containing 16                                                                                          |
| ENSMUSG00000030465 | Psd3          | pleckstrin and Sec7 domain containing 3                                                                          |
| ENSMUSG00000038764 | Ptpn3         | protein tyrosine phosphatase, non-receptor type 3                                                                |
| ENSMUSG00000053141 | Ptprt         | protein tyrosine phosphatase, receptor type, T                                                                   |
| ENSMUSG00000068748 | Ptprz1        | protein tyrosine phosphatase, receptor type Z, polypeptide 1                                                     |
| ENSMUSG00000037098 | Rab11fip3     | RAB11 family interacting protein 3 (class II)                                                                    |
| ENSMUSG00000027652 | Ralgapb       | Ral GTPase activating protein, beta subunit (non-catalytic)                                                      |
| ENSMUSG00000075376 | Rc3h2         | ring finger and CCCH-type zinc finger domains 2                                                                  |
| ENSMUSG00000042453 | Reln          | reelin                                                                                                           |
| ENSMUSG00000050310 | Rictor        | RPTOR independent companion of MTOR, complex 2                                                                   |
| ENSMUSG00000020448 | Rnf185        | ring finger protein 185                                                                                          |
| ENSMUSG00000038685 | Rtel1         | regulator of telomere elongation helicase 1                                                                      |
| ENSMUSG00000021313 | Ryr2          | ryanodine receptor 2, cardiac                                                                                    |
| ENSMUSG00000075318 | Scn2a1        | sodium channel, voltage-gated, type II, alpha 1                                                                  |
| ENSMUSG00000028064 | Sema4a        | sema domain, immunoglobulin domain (Ig), transmembrane domain (TM) and short cytoplasmic domain, (semaphorin) 4A |

*Continued on next page*

Table 2 – *Continued from previous page*

| <b>Ensembl ID</b>  | <b>symbol</b> | <b>name</b>                                                                   |
|--------------------|---------------|-------------------------------------------------------------------------------|
| ENSMUSG0000005089  | Slc1a2        | solute carrier family 1 (glial high affinity glutamate transporter), member 2 |
| ENSMUSG00000023032 | Slc4a8        | solute carrier family 4 (anion exchanger), member 8                           |
| ENSMUSG00000019769 | Syne1         | synaptic nuclear envelope 1                                                   |
| ENSMUSG00000062542 | Syt9          | synaptotagmin IX                                                              |
| ENSMUSG00000053580 | Tanc2         | tetratricopeptide repeat, ankyrin repeat and coiled-coil containing 2         |
| ENSMUSG00000023923 | Tbc1d5        | TBC1 domain family, member 5                                                  |
| ENSMUSG00000039230 | Tbcd          | tubulin-specific chaperone d                                                  |
| ENSMUSG00000032186 | Tmod2         | tropomodulin 2                                                                |
| ENSMUSG00000009470 | Tnpo1         | transportin 1                                                                 |
| ENSMUSG00000019820 | Utrn          | utrophin                                                                      |
| ENSMUSG00000046230 | Vps13a        | vacuolar protein sorting 13A (yeast)                                          |
| ENSMUSG00000045962 | Wnk1          | WNK lysine deficient protein kinase 1                                         |
| ENSMUSG00000047694 | Yipf6         | Yip1 domain family, member 6                                                  |
| ENSMUSG00000020812 |               | RIKEN cDNA 1810032O08                                                         |
| ENSMUSG00000053081 |               | RIKEN cDNA 1700069B07                                                         |
| ENSMUSG00000072847 |               | RIKEN cDNA A530017D24                                                         |



Table 3: 23 genes with differential isoform usage (DU only p-value < 0.01) between the two alleles of the haloperidol treated F1(129×PWK) mouse, but no differential isoform usage (DU only p-value > 0.1) comparing the two alleles of the placebo treated F1(129×PWK) mouse.

| <b>Ensembl ID</b>  | <b>symbol</b> | <b>name</b>                                                                                  |
|--------------------|---------------|----------------------------------------------------------------------------------------------|
| ENSMUSG00000006638 | Abhd1         | abhydrolase domain containing 1                                                              |
| ENSMUSG00000005686 | Ampd3         | adenosine monophosphate deaminase 3                                                          |
| ENSMUSG00000004446 | Bid           | BH3 interacting domain death agonist                                                         |
| ENSMUSG00000022617 | Chkb          | choline kinase beta                                                                          |
| ENSMUSG00000026816 | Gtf3c5        | general transcription factor IIIC, polypeptide 5                                             |
| ENSMUSG00000031787 | Katnb1        | katanin p80 (WD40-containing) subunit B 1                                                    |
| ENSMUSG00000058740 | Kcnt1         | potassium channel, subfamily T, member 1                                                     |
| ENSMUSG00000039682 | Lap3          | leucine aminopeptidase 3                                                                     |
| ENSMUSG00000026792 | Lrsam1        | RIKEN cDNA 4930555K19                                                                        |
| ENSMUSG00000024085 | Man2a1        | mannosidase 2, alpha 1                                                                       |
| ENSMUSG00000029822 | Osbp13        | oxysterol binding protein-like 3                                                             |
| ENSMUSG00000021846 | Peli2         | pellino 2                                                                                    |
| ENSMUSG00000033628 | Pik3c3        | phosphoinositide-3-kinase, class 3                                                           |
| ENSMUSG00000005225 | Plekha8       | pleckstrin homology domain containing, family A (phosphoinositide binding specific) member 8 |
| ENSMUSG00000026035 | Ppil3         | peptidylprolyl isomerase (cyclophilin)-like 3                                                |
| ENSMUSG00000036202 | Rif1          | Rap1 interacting factor 1 homolog (yeast)                                                    |
| ENSMUSG00000001054 | Rmnd5b        | required for meiotic nuclear division 5 homolog B ( <i>S. cerevisiae</i> )                   |
| ENSMUSG00000052656 | Rnf103        | ring finger protein 103                                                                      |
| ENSMUSG00000027273 | Snap25        | synaptosomal-associated protein 25                                                           |
| ENSMUSG00000043079 | Synpo         | synaptopodin                                                                                 |
| ENSMUSG00000040389 | Wdr47         | WD repeat domain 47                                                                          |
| ENSMUSG00000001017 |               | RIKEN cDNA 2500003M10                                                                        |
| ENSMUSG00000044600 |               | RIKEN cDNA 9130011J15                                                                        |

## References

- [1] Friedman, J., Hastie, T., and Tibshirani, R. (2010) Regularization paths for generalized linear models via coordinate descent. *Journal of Statistical Software*, **33**(1), 1–22.
- [2] Sun, W., Ibrahim, J., and Zou, F. (2010) Genomewide Multiple-Loci Mapping in Experimental Crosses by Iterative Adaptive Penalized Regression. *Genetics*, **185**(1), 349.
- [3] Chen, J. and Chen, Z. (2012) Extended BIC for small-n-large-p sparse glm. *Statistica Sinica*, **22**(2), 555.
- [4] Fleischmann, N., Christ, G., Scalfani, T., and Melman, A. (2002) The effect of ovariectomy and long-term estrogen replacement on bladder structure and function in the rat. *The Journal of urology*, **168**(3), 1265–1268.
- [5] Hsin-Tung, E. and Simpson, G. (2000) Medication-induced movement disorders. *Kaplan and Sadocks Comprehensive Text Book of Psychiatry. Baltimore, Maryland: Williams and Wilkins*, pp. 2265–2271.
- [6] Trapnell, C., Pachter, L., and Salzberg, S. (2009) TopHat: discovering splice junctions with RNA-Seq. *Bioinformatics*, **25**(9), 1105.
- [7] Church, D., Goodstadt, L., Hillier, L., Zody, M., Goldstein, S., She, X., Bult, C., Agarwala, R., Cherry, J., DiCuccio, M., et al. (2009) Lineage-specific biology revealed by a finished genome assembly of the mouse. *PLoS biology*, **7**(5), e1000112.
- [8] Keane, T., Goodstadt, L., Danecek, P., White, M., Wong, K., Yalcin, B., Heger, A., Agam, A., Slater, G., Goodson, M., et al. (2011) Mouse genomic variation and its effect on phenotypes and gene regulation. *Nature*, **477**(7364), 289–294.
- [9] Li, H., Handsaker, B., Wysoker, A., Fennell, T., Ruan, J., Homer, N., Marth, G., Abecasis, G., Durbin, R., et al. (2009) The sequence alignment/map format and samtools. *Bioinformatics*, **25**(16), 2078–2079.
- [10] Zhou, H., Lange, K., and Suchard, M. (2010) Graphical processing units and high-dimensional optimization. *Statistical Science*, **25**, 311–324.

- [11] Zhou, H. and Lange, K. (2010) MM algorithms for some discrete multivariate distributions. *Journal of Computational and Graphical Statistics*, **19**, 645–665.
- [12] Crowley, J., Adkins, D., Pratt, A., Quackenbush, C., van denOord, E., Moy, S., Wilhelmsen, K., Cooper, T., Bogue, M., McLeod, H., et al. (2012) Antipsychotic-induced vacuous chewing movements and extrapyramidal side effects are highly heritable in mice.. *The pharmacogenomics journal*, **12**(2), 147.
- [13] Montgomery, S., Sammeth, M., Gutierrez-Arcelus, M., Lach, R., Ingle, C., Nisbett, J., Guigo, R., and Dermitzakis, E. (2010) Transcriptome genetics using second generation sequencing in a Caucasian population. *Nature*, **464**(7289), 773–777.
